# Supplementary material
Source: PubMed Central journal article supplement (PMC2852959)

## Supplement

### Targeted Deletion of Hepatocyte ABCA1 Leads to VLDL Triglyceride Overproduction and LDL hypercatabolism

Soonkyu Chung<sup>1</sup>, Jenelle M. Timmins<sup>1</sup>, MyNgan Duong<sup>1</sup>, Chiara Degirolamo<sup>1</sup>, Shunxing Rong<sup>1</sup>, Janet K. Sawyer<sup>1</sup>, Roshni R. Singaraja<sup>2</sup>, Michael R. Hayden<sup>2</sup>, Nobuyo Maeda<sup>3</sup>, Lawrence L. Rudel<sup>1</sup>, Gregory S. Shelness<sup>1</sup>, and John S. Parks<sup>1,\*</sup>

<sup>1</sup>Department of Pathology/Section on Lipid Sciences, Wake Forest University Health Sciences, Winston-Salem, NC 27157, <sup>2</sup>Centre for Molecular Medicine and Therapeutics, University of British Columbia, Vancouver, British Columbia, V5Z 4H4 Canada, <sup>3</sup>Department of Pathology and Laboratory Medicine, University of North Carolina, Chapel Hill, NC, 27599

Running title: Hepatic ABCA1 regulates apoB-containing Lp metabolism

\*Correspondence to: John S. Parks, Ph.D., Department of Pathology/Section on Lipid Sciences, Wake Forest University Health Sciences, Medical Center Blvd., Winston-Salem, NC, USA, 27157-1040. Email: [jparks@wfubmc.edu](mailto:jparks@wfubmc.edu) Phone: (336)716-2145 Fax: (336)716-6279

**Table 1. Gene-specific primers for qPCR**

| Target mRNA   | Forward Primer          | Reverse Primer                    |
|---------------|-------------------------|-----------------------------------|
| ABCG5         | TGG CCC TGC TCA GCA TCT | ATT TTT AAA GGA ATG GGC ATC TCT T |
| LRP           | TGGGTCTCCCGAAATCTGTT    | CCACCGCATTCTTGAAGGA               |
| LDLr          | AGGCTGTGGGCTCCATAGG     | TGCGGTCCAGGGTCATCT                |
| SREBP1c       | GGCCGAGATGTGCGAACT      | TTGTTGATGAGCTGGAGCATGT            |
| PPAR $\alpha$ | ACAAGGCCTCAGGGTACCA     | GCCGAAAGAAGCCCTTACAG              |
| PPAR $\gamma$ | CACAATGCCATCAGGTTTGG    | GCTGGTCGATATCACTGGAGATC           |
| PGC1 $\alpha$ | AACCACACCCACAGGATCAGA   | TCTTCGCTTTATTGCTCCATGA            |
| FXR $\alpha$  | TGGGCTCCGAATCCTCTTAGA   | TGGTCCTCAAATAAGATCCTTGG           |
| MTP           | CCTACCAGGCCCAACAAGAC    | CGCTCAATTTTGCATGTATCC             |

**Supplement Fig. 1. A.** Real time PCR quantification of hepatic mRNA levels of ABCG5, ABCG1, LRP and SRB-1. Data were normalized to GAPDH expression (mean  $\pm$  SEM; n=3 per genotype). **B.** Western blot analysis of hepatic SR-B1 and EL expression in WT and HSKO mice (n=3).

# Supplemental Figure 1

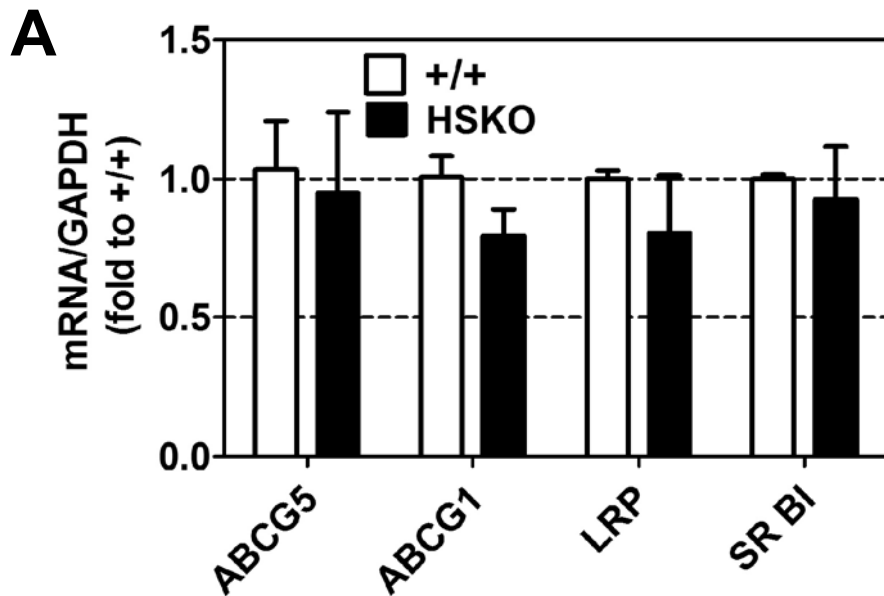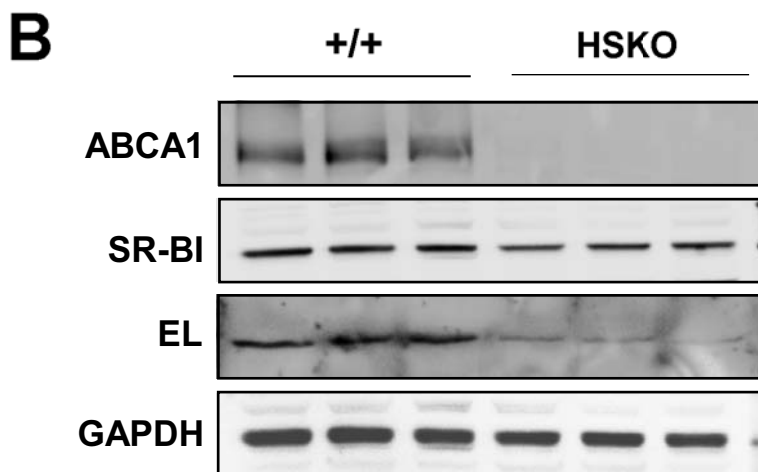

Supplement: supp_M109.096933_jbc.M109.096933-1.pdf [file supp_M109.096933_jbc.M109.096933-1.pdf]
